# Supplementary material for: Genetic, Epigenetic, and Immunologic Profiling of MMR-Deficient Relapsed Glioblastoma
Source: Oxford University Press journal article supplement (doi:10.1158/1078-0432.ccr-18-1892), 2018-12-04
Supplement: 10780432ccr181892-sup-203643_3_supp_5163107_pl6wr2.docx [file 10780432ccr181892-sup-203643_3_supp_5163107_pl6wr2.docx]

**SUPPLEMENTARY FIGURES**


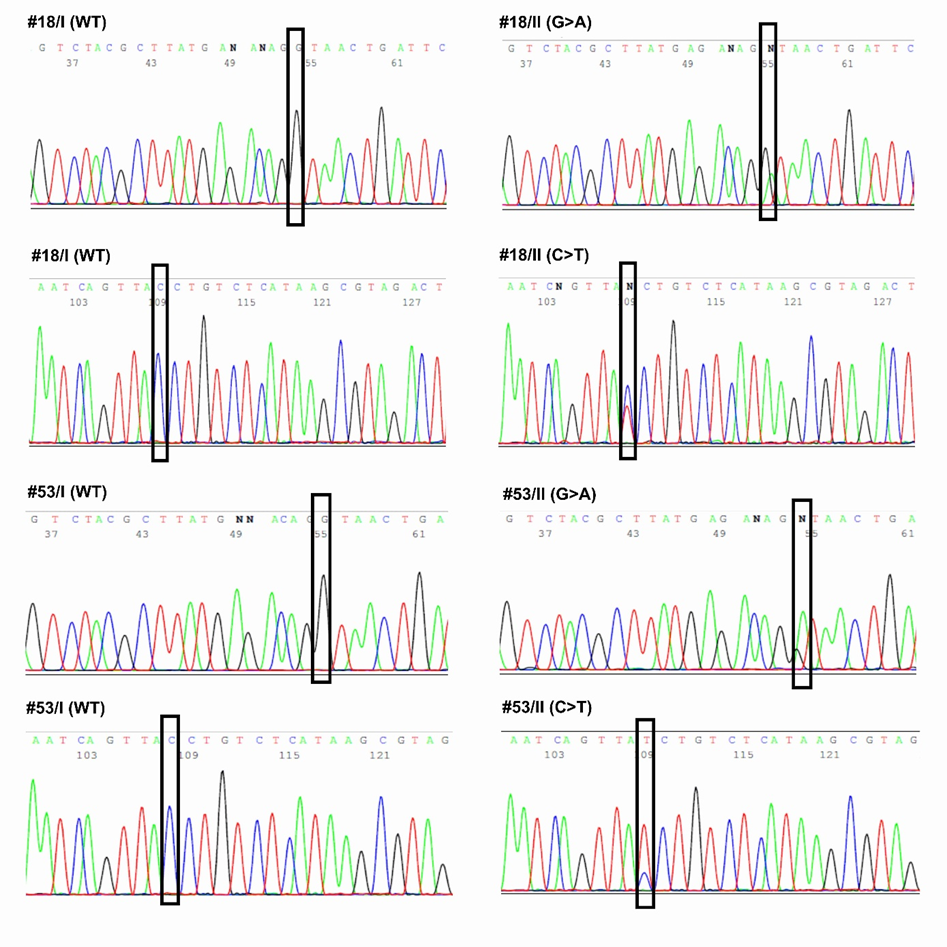


**Supplementary Figure S1. Validation by Sanger sequencing of the c.3438+1G>A* MSH6 variant**

Detection of the exon-skipping mutation in the MSH6 negative recurrent GBM tumors (#18/II, #53/II) in both strands (forward, upper panel; reverse, lower panel) compared to their matched primary counterpart (#18/I, #53/I), which stained positive for MSH6.


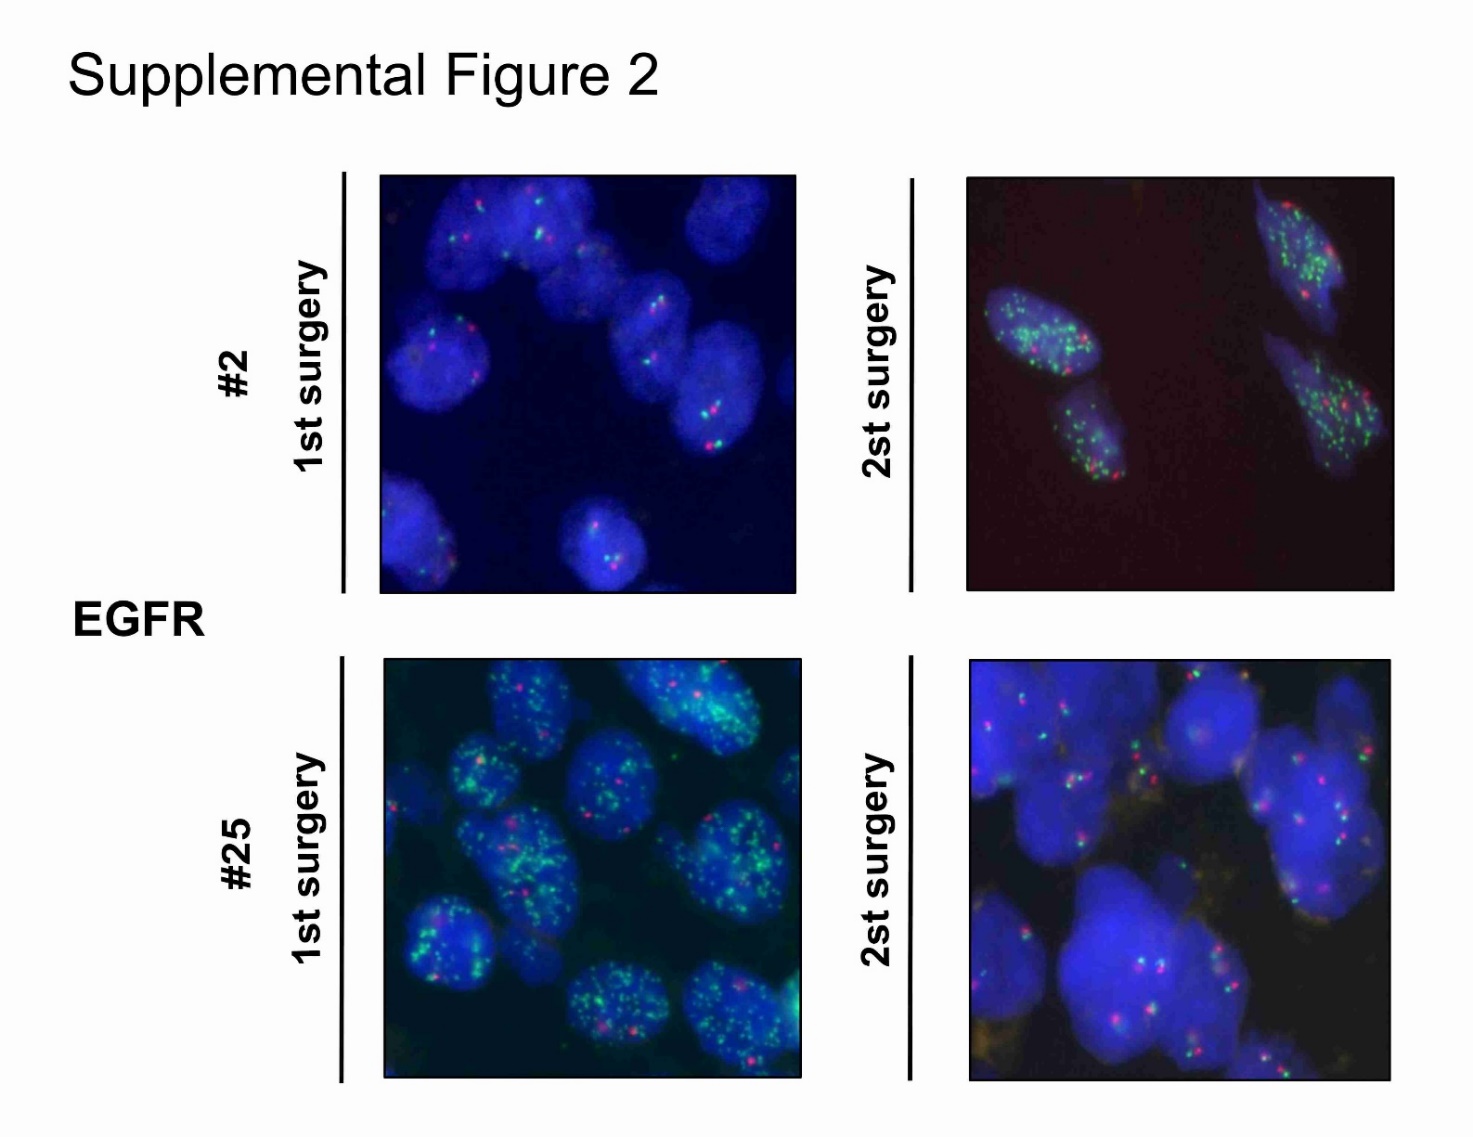


**Supplementary Figure S2. EGFR amplification by FISH analysis**

Two representative cases illustrating loss of EGFR amplification at relapse (#25) or gain of EGFR amplification at relapse (#2) are shown.


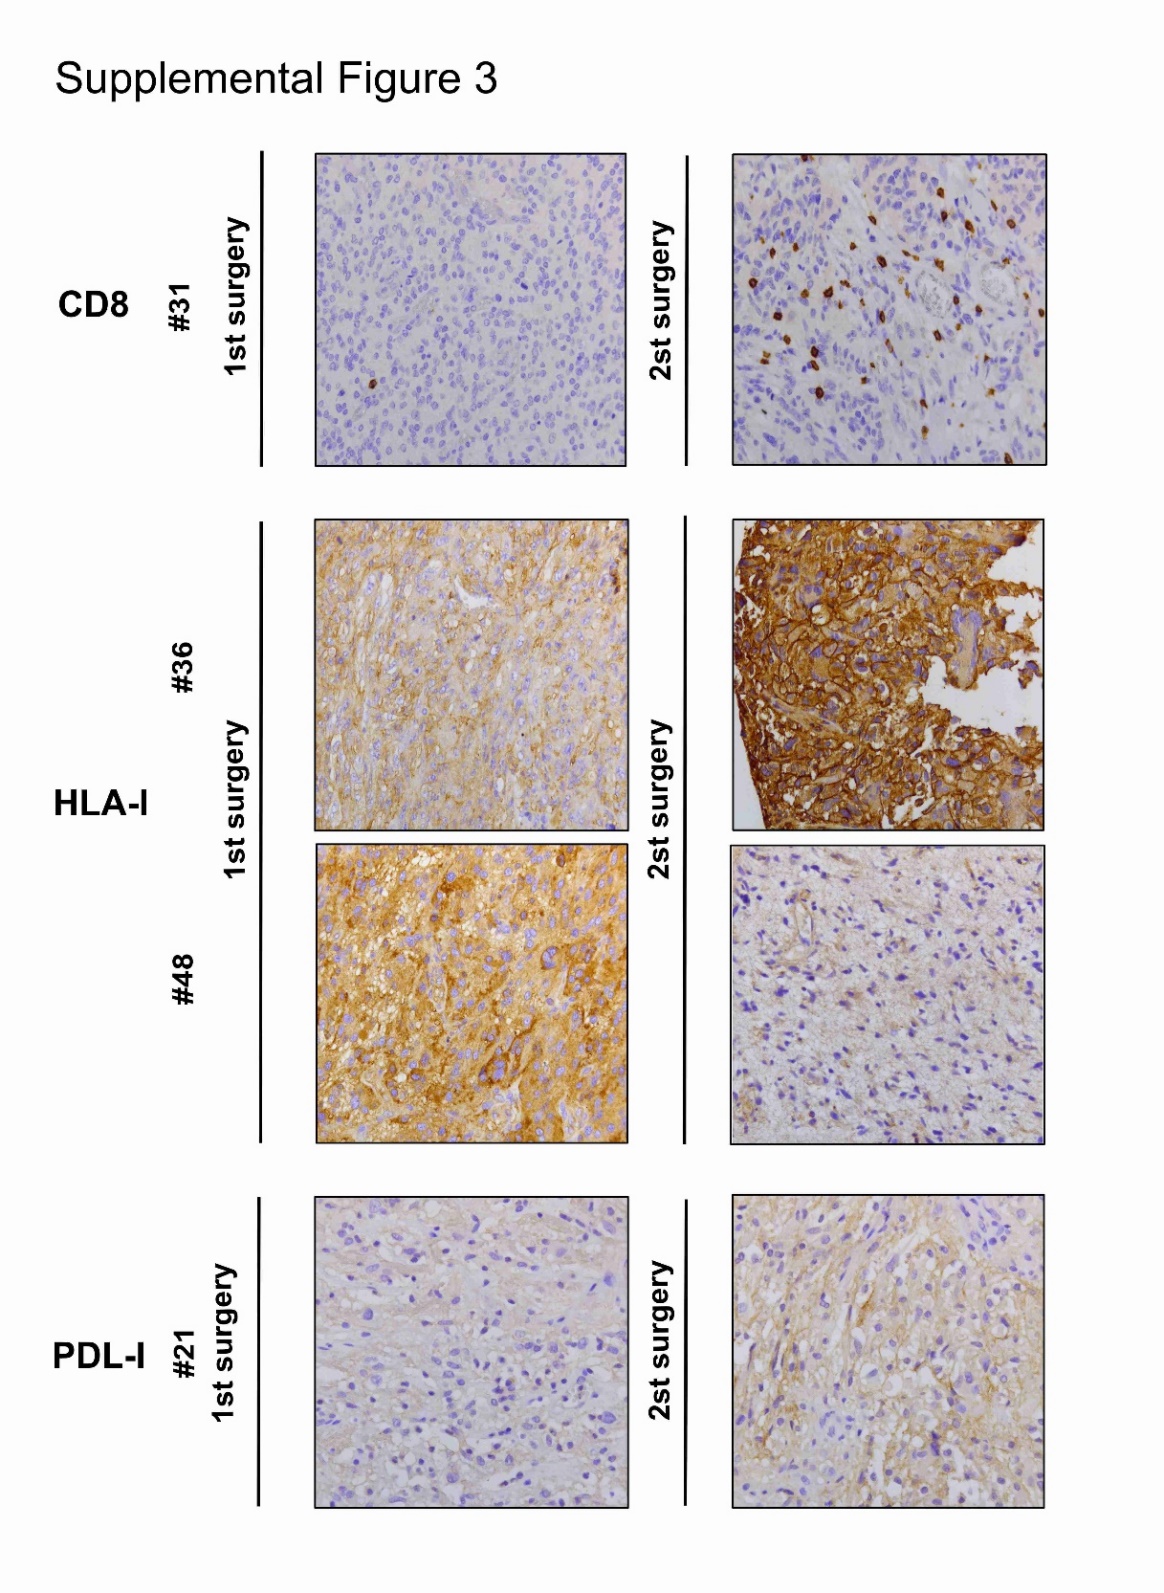


**Supplementary Figure S3. Immunological markers in relapsed GBM**

Representative images of CD8+ cells, HLA class I and PD-L1 expression in GBM samples. Magnification x20 was used.

**
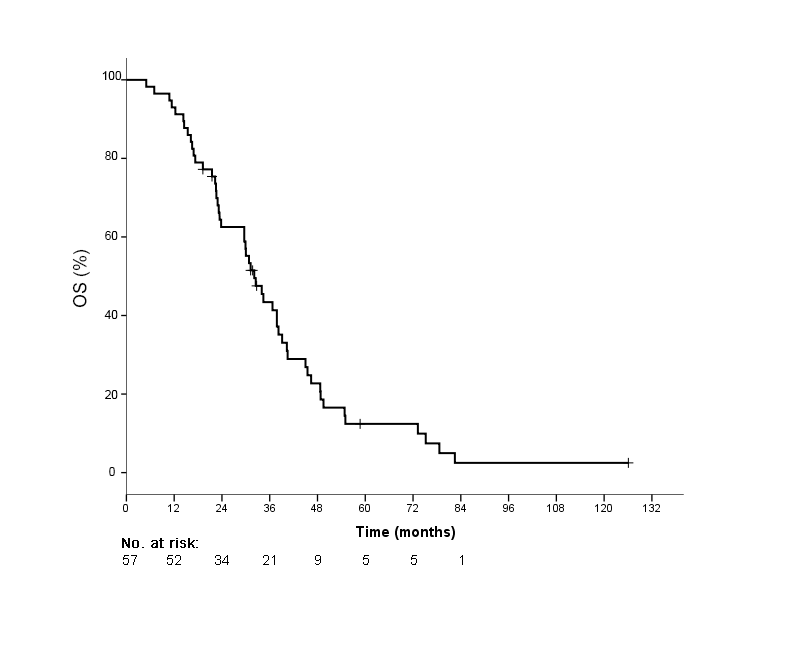
**

**
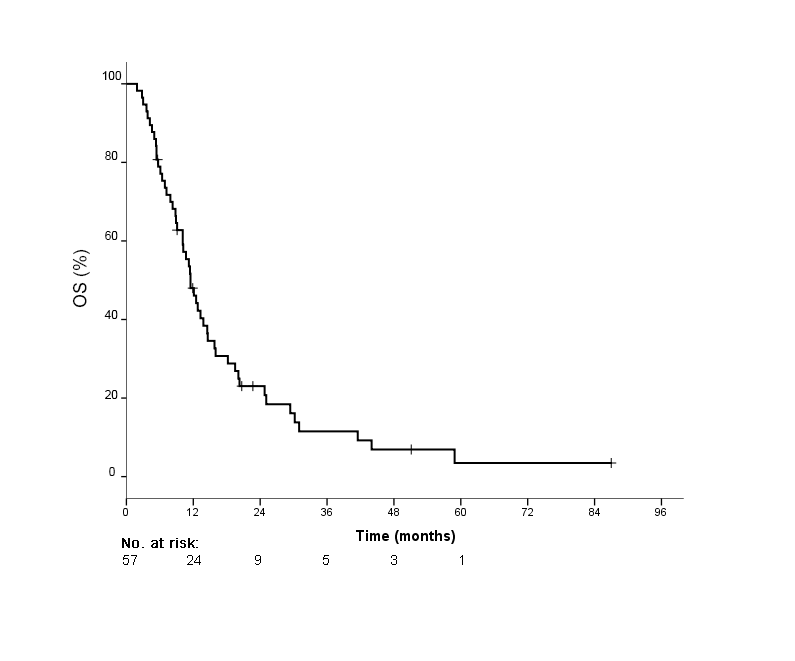
**

**Supplementary Figure S4.** Kaplan-Meier survival curves, calculated from first surgery (top panel) or second surgery (bottom panel).

**
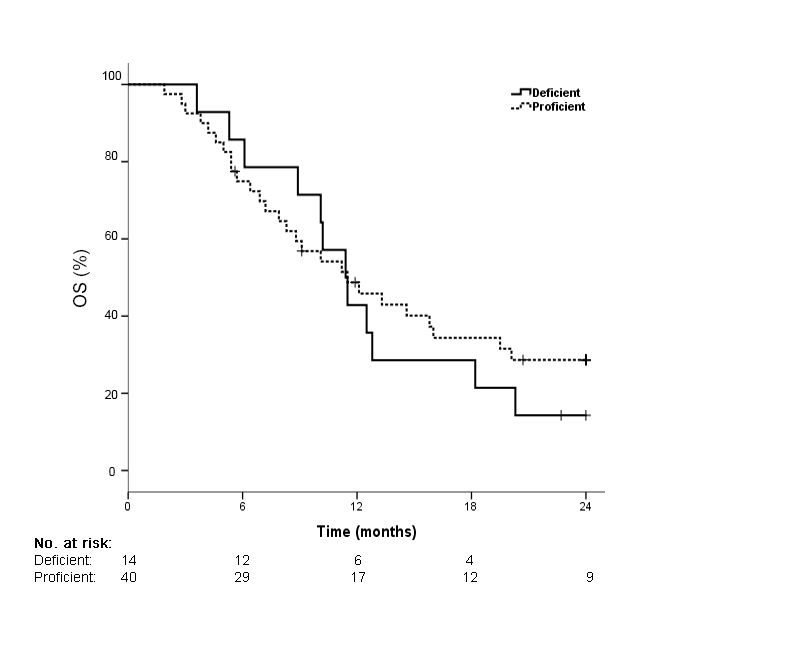
**

**Supplementary Figure S5.** Kaplan-Meier survival curves according to MMR status, calculated from relapse.

**
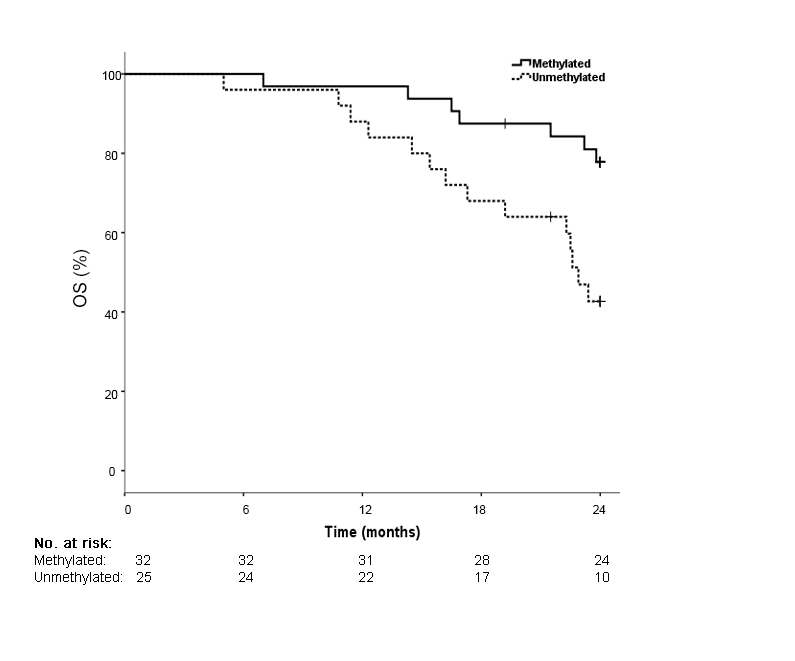
**

**Supplementary Figure S6.** Kaplan-Meier survival curves according to MGMT status, calculated from relapse.


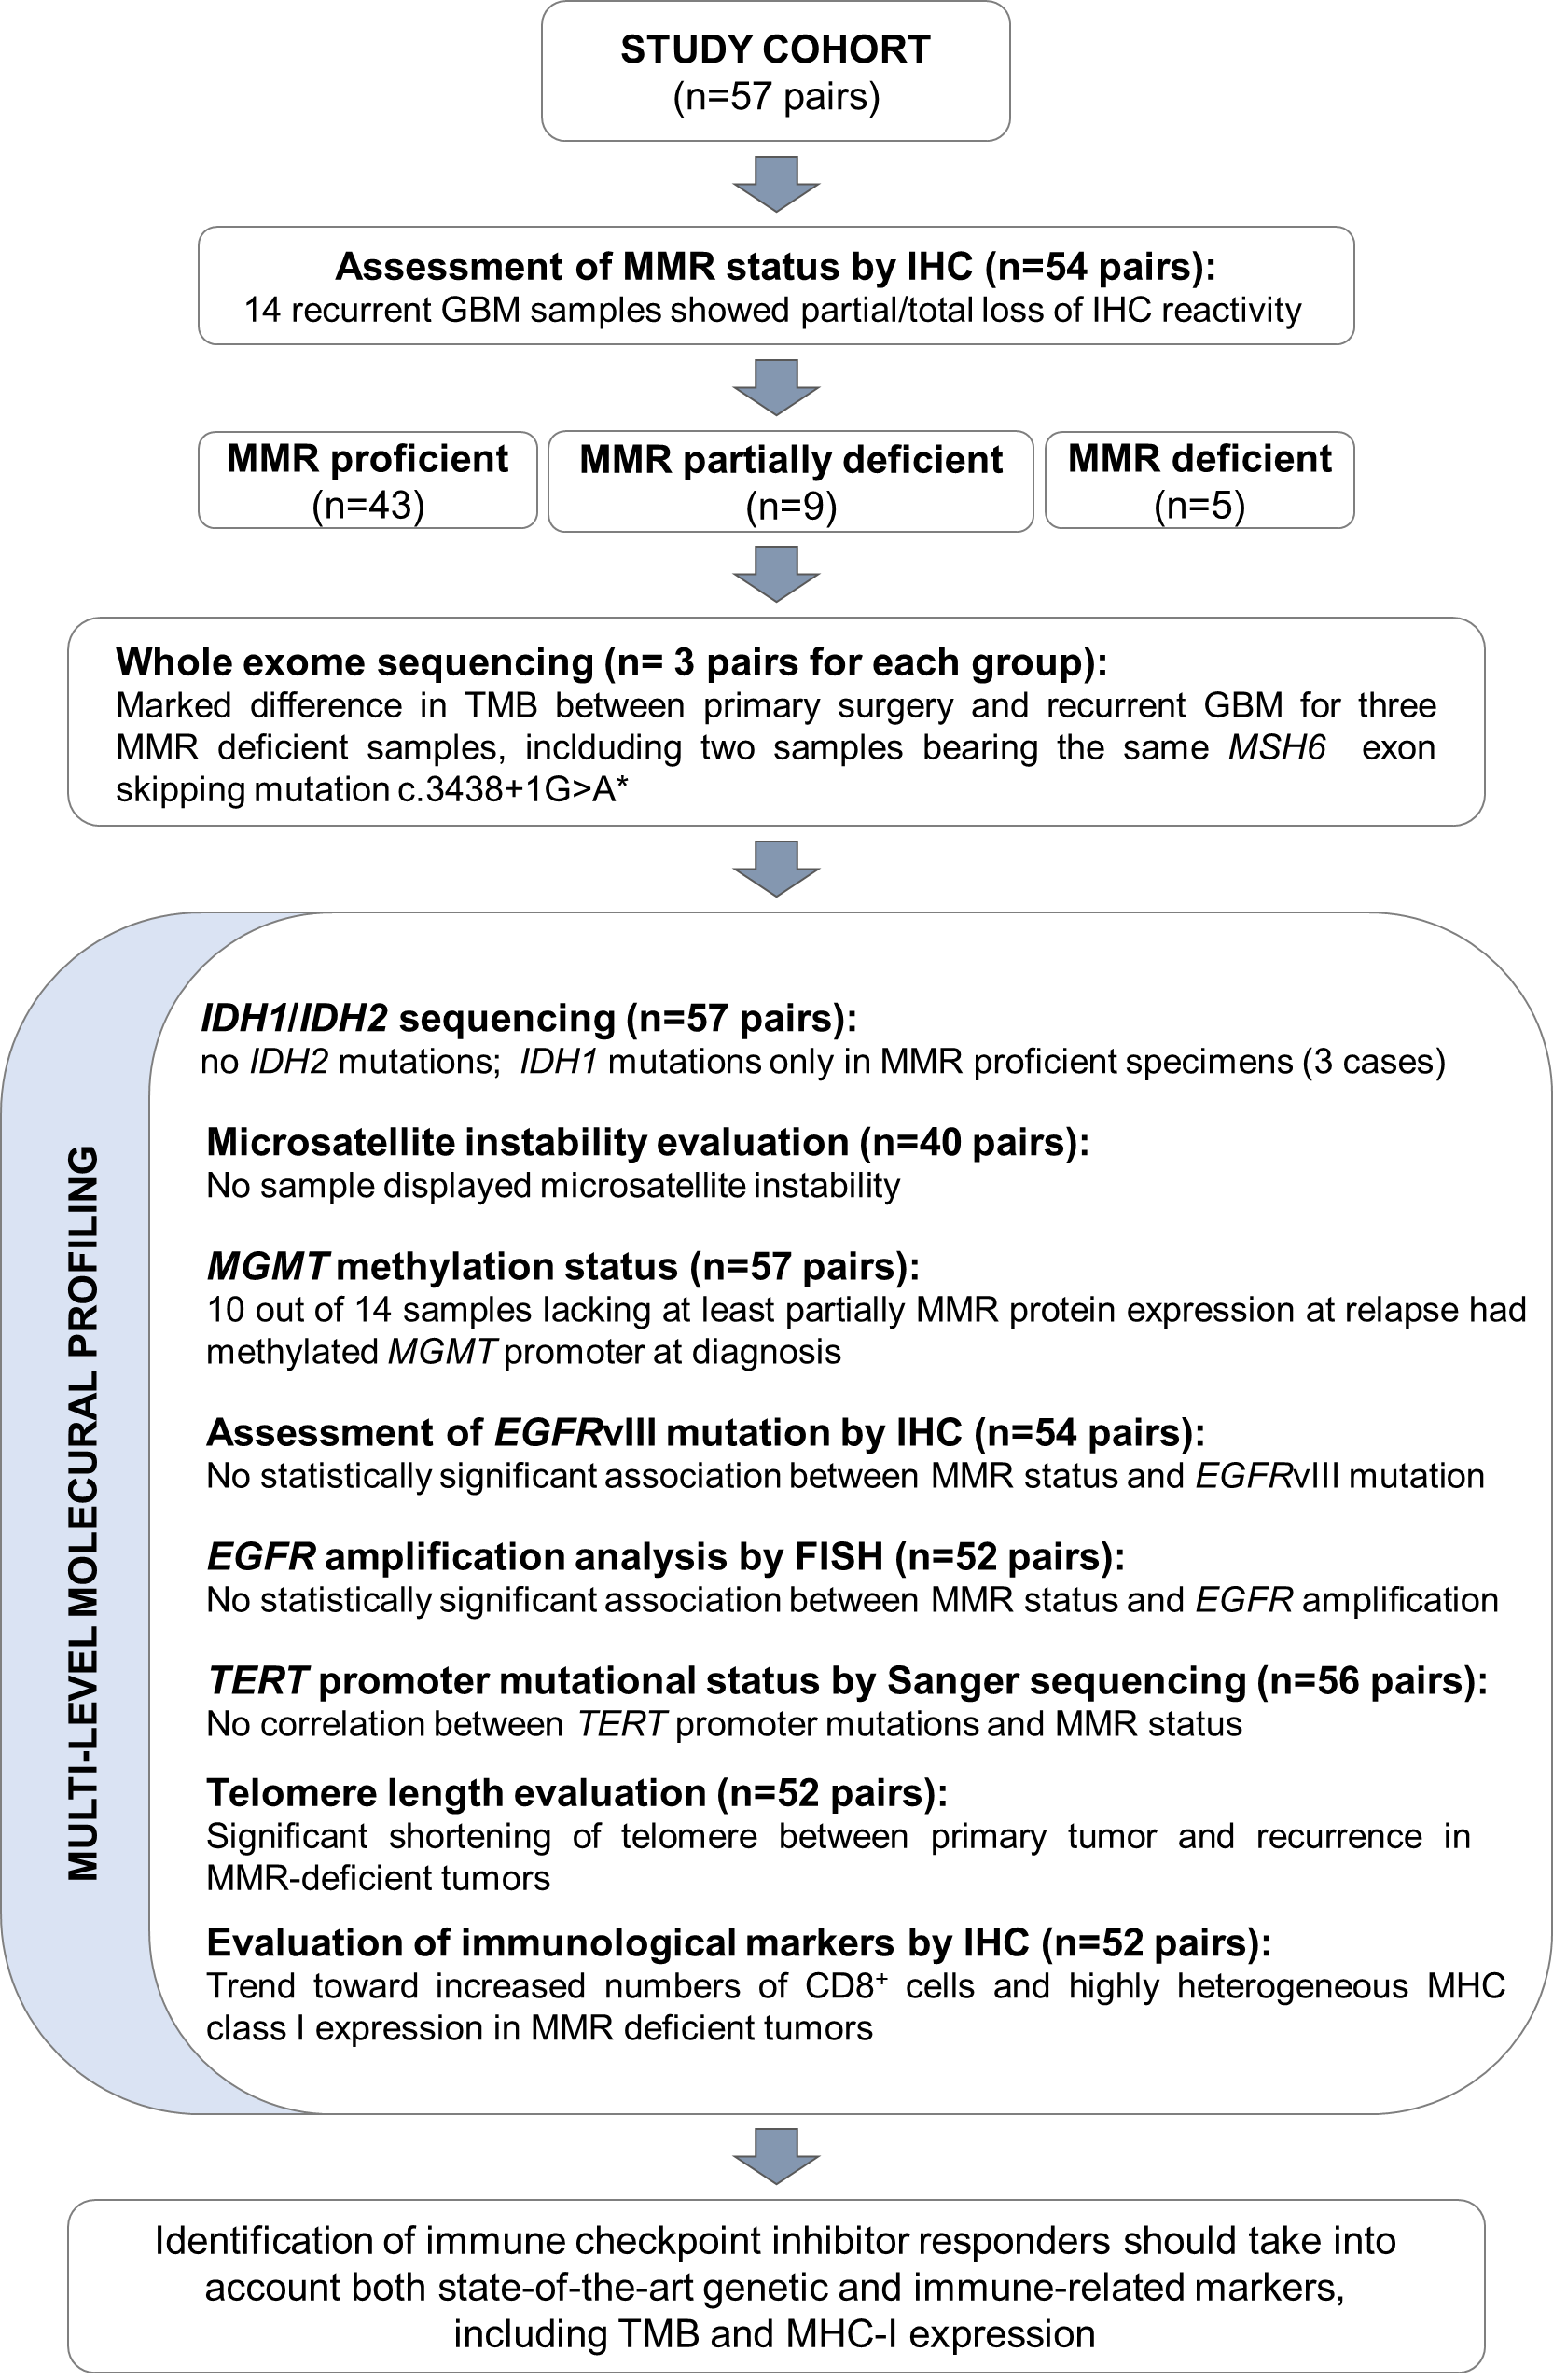


**Supplementary Figure S7.** Multilevel profiling workflow and overview of the main findings of the study. MMR= mismatch repair; IHC = immunohistochemistry; TMB = tumor mutational burden; EGFRvIII = epidermal growth factor receptor variant III; FISH = fluorescence in situ hybridization; MHC-I = Major Histocompatibility Complex, class I.
